# Supplementary material
Source: publisher figshare collection journal article supplement (https://acs.figshare.com/ndownloader/files/7432597)
Supplement: Supplementary file 1 [file 7432597]

## SUPPORTING INFORMATION

### **Morphological and thermo-chemical changes upon autohydrolysis and microemulsion treatments of coir and Empty Fruit Bunch (EFB) residual biomass to isolate lignin-rich micro and nano fibrillar cellulose (MNFC)**

*Anurodh Tripathi<sup>1,2\*</sup>, Ana Ferrer<sup>2,&</sup>, Saad A. Khan<sup>1</sup> and Orlando J. Rojas<sup>1,2,3\*</sup>*

<sup>1</sup> Department of Chemical & Biomolecular Engineering, NC State University, 911 Partners Way, Raleigh, NC 27659, USA.

<sup>2</sup> Department of Forest Biomaterials, NC State University, 2820 Faucette Drive, Raleigh, NC 27607, USA.

<sup>3</sup> Department of Byproducts and Biosystems, School of Chemical Engineering, Aalto University, Vuorimiehentie 1, P.O. Box 16300, FIN-00076 Aalto, Espoo, Finland.

& Current address: Asset Integrity, Nalco Champion (Ecolab), 7705 Highway 90-A, Sugar Land, TX 77478, USA.

Pages: 5  
Figures: 3  
Tables: 1

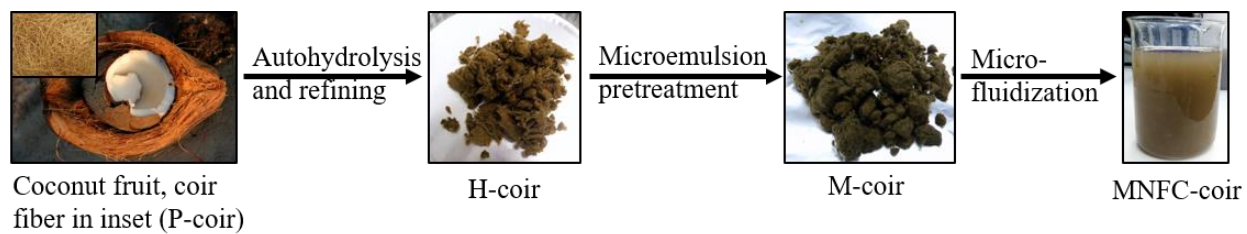

**Figure S1.** The synthesis procedure for the micro-nano fibrillar cellulose from coir fiber (MNFC-coir) and the sample nomenclature is shown. The as received coir fiber (P-coir) was subjected to autohydrolysis and fiber refining (H-coir) followed by microemulsion pretreatment (M-coir) and microfluidization to produce MNFC-coir. The same procedure was carried on EFB fibers.

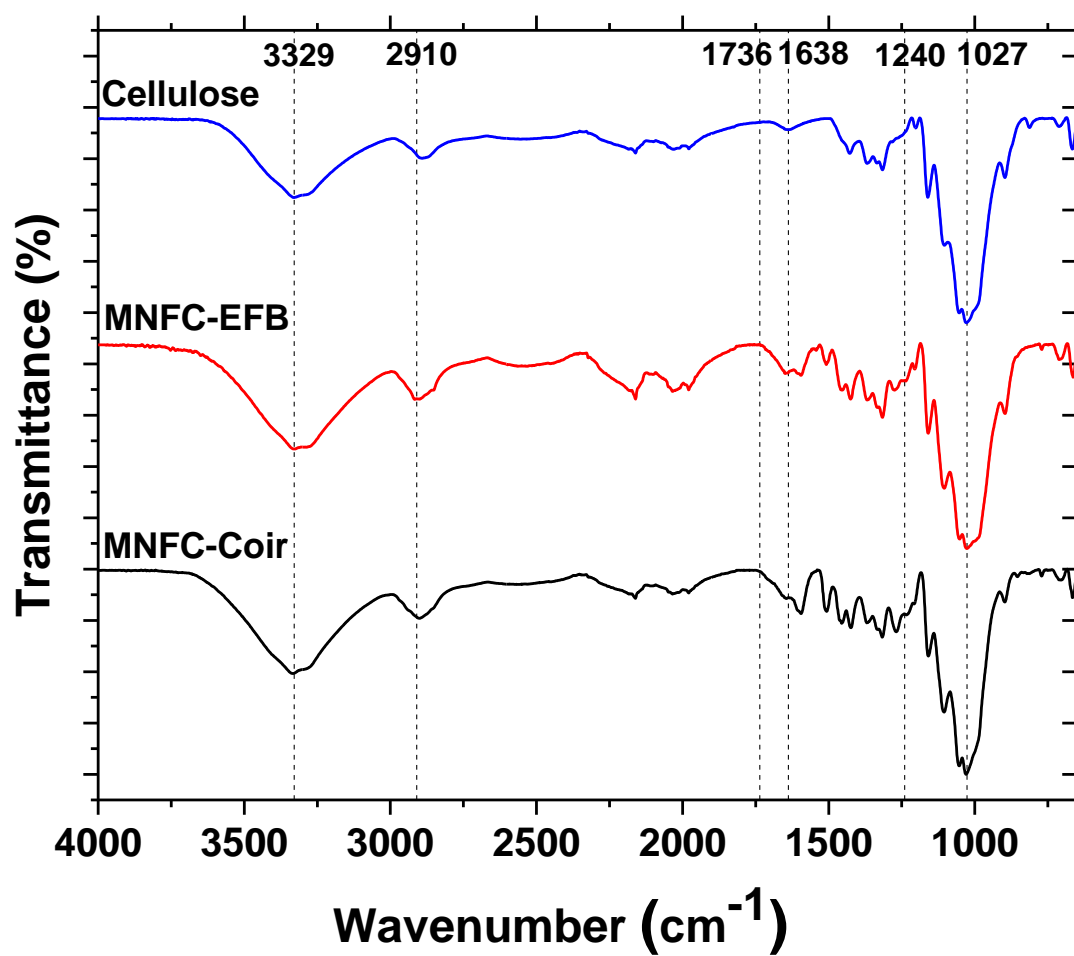

**Figure S2:** FTIR spectra of pure cellulose with MNFC-Coir and MNFC-EFB

**Table S1:** Transmission peaks observed for coir and EFB samples along with the identified functional groups, chemical compounds and fiber component consisting of the identified functional groups. (C = Cellulose, H = Hemicelluloses, L = Lignin).

| <b>Wavenumber<br/>(cm<sup>-1</sup>)</b> | <b>Functional groups</b>                  | <b>Organic Compound(s)<br/>containing functional groups</b> | <b>Fiber<br/>component</b> |
|-----------------------------------------|-------------------------------------------|-------------------------------------------------------------|----------------------------|
| 3329                                    | O-H stretch                               | Acid and alcohol                                            | C, H, L                    |
| 2910                                    | sp <sup>3</sup> C-H stretch               | Alkyl, aliphatic, aromatic                                  | C, H, L                    |
| 1736-1715                               | C=O stretch                               | Ketone, ester and carboxylic                                | H                          |
| 1640                                    | O-H bend                                  | Adsorbed water                                              | C                          |
| 1600-1460                               | C=C stretch of aromatic                   | Aromatic rings                                              | L                          |
| 1470-1430                               | O-CH <sub>3</sub>                         | Methoxy (O-CH <sub>3</sub> ) on aromatic<br>ring            | L                          |
| 1440-1400                               | O-H bending                               | Acid                                                        | C, H, L                    |
| 1400-1300                               | Sp <sup>3</sup> C-H bend                  | Saturated alkanes                                           | C, H, L                    |
| 1240                                    | Acyl C-O (C-O-C stretching)               | Aryl-alkyl ether linkage                                    | C, L                       |
| 1161, 1100                              | C-O-C stretching vibration                | Pyranose ring skeletal                                      | C, H                       |
| 1027                                    | Alkoxy C-O stretch and C-O<br>deformation | C-OH (ethanol)                                              | C, H, L                    |
| 898                                     | C-O-C stretching vibration                | Glycosidic linkage between<br>glucose units                 | C, H                       |
| 700-900                                 | Aromatic sp <sup>2</sup> bend             | Aromatic hydrogen                                           | L                          |

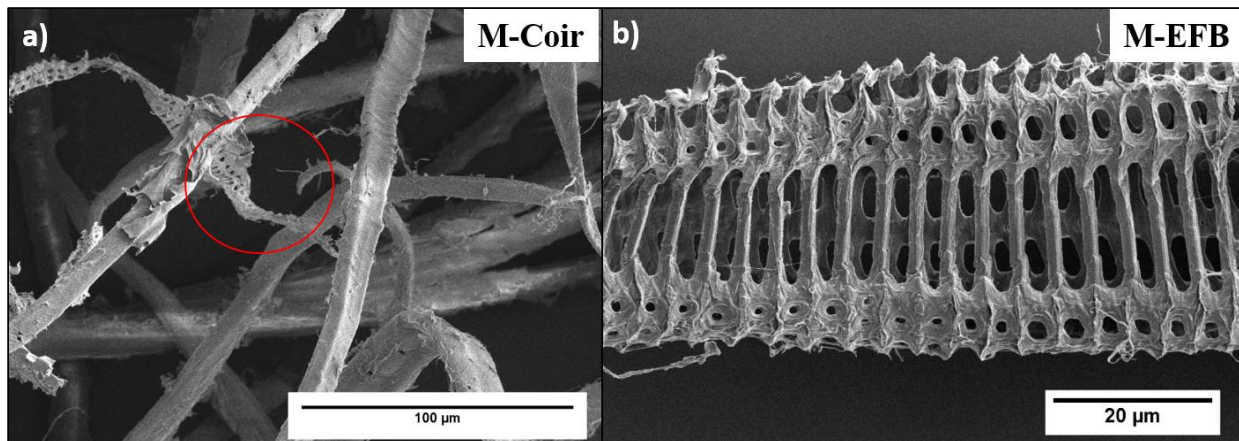

**Figure S3:** The Coir and EFB fibers showing the vessel element.

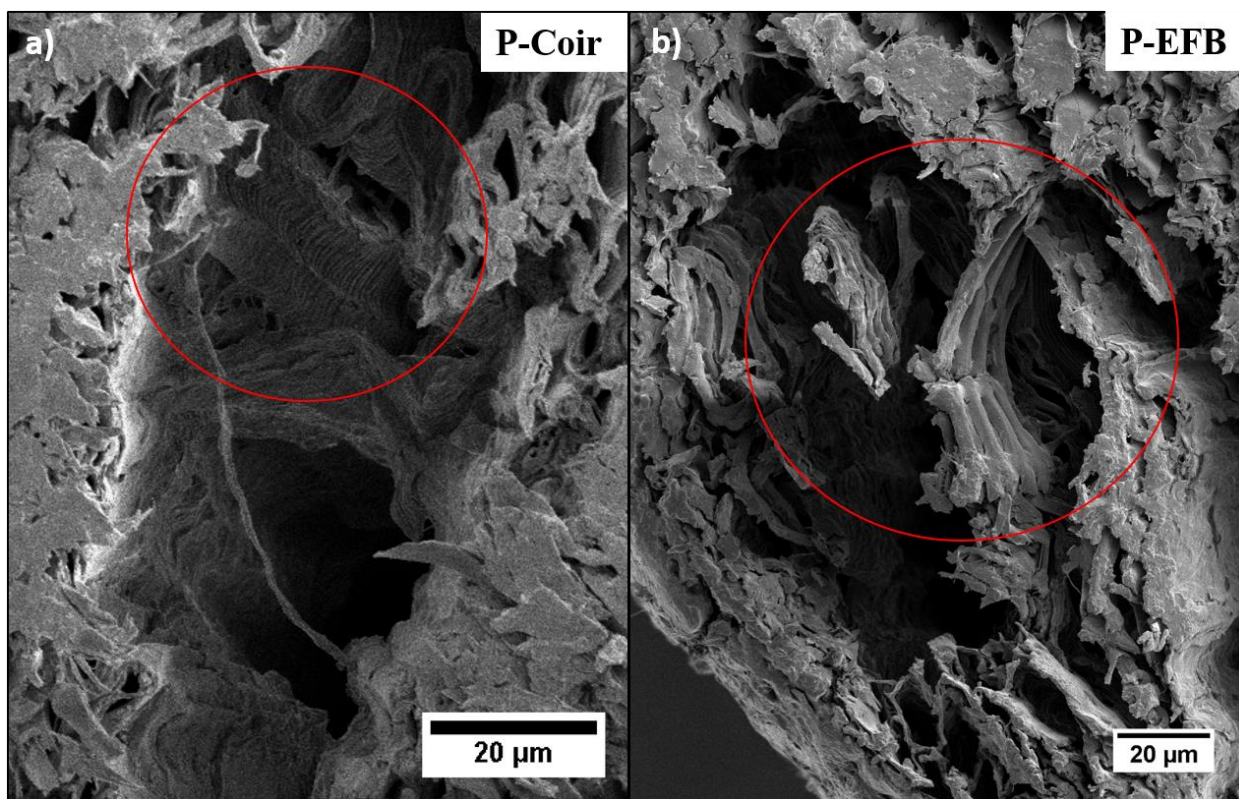

**Figure S4:** Cross-section of the untreated or pristine coir and EFB fibers showing the vessel element in solid circles
